# Supplementary material for: Towards Risk Assessments of Microplastics in Bivalve Mollusks Globally
Source: MDPI journal article supplement (doi:10.3390/jmse10020288), 2022-02-19
Supplement: s1 [file s1]

# Supplementary material

*Review*

## Towards risk assessments of microplastics in bivalve mollusks globally

Jinfeng Ding <sup>1,2</sup>, Yunmei Sun <sup>2</sup>, Changfei He <sup>3</sup>, Jingxi Li <sup>2,\*</sup>, and Fengmin Li <sup>1,\*</sup>

<sup>1</sup> Institute of Coastal Environmental Pollution Control, Ministry of Education Key Laboratory of Marine Environment and Ecology, and College of Environmental Science and Engineering, Ocean University of China, Qingdao 266100, China; [dingjf1004@gmail.com](mailto:dingjf1004@gmail.com)

<sup>2</sup> Key Laboratory of Marine Eco-environmental Science and Technology, Marine Bioresource and Environment Research Center, First Institute of Oceanography, Ministry of Natural Resources (MNR), Qingdao 266061, China; [sym46\\_99@163.com](mailto:sym46_99@163.com)

<sup>3</sup> Institute of Marine Science and Technology, Shandong University, Qingdao 266200, China; [hchangfei@gmail.com](mailto:hchangfei@gmail.com)

\* Correspondence: [jxli@fio.org.cn](mailto:jxli@fio.org.cn) (J.L.); [lifengmin@ouc.edu.cn](mailto:lifengmin@ouc.edu.cn) (F.L.)

**Table S1.** Abundance of microplastics in bivalves from 22 countries reviewed from the fifty-two studies.

| Country       | Species                          | Sample size     | Mean number of microplastics per gram (items/g) | Mean number of microplastics per gram (items/g) in each country |
|---------------|----------------------------------|-----------------|-------------------------------------------------|-----------------------------------------------------------------|
| Argentina [1] | <i>Brachidontes rodriguezii</i>  | 90              | 0.17                                            | 0.25                                                            |
|               | <i>Amarilladesma mactroides</i>  | 30              | 0.33                                            |                                                                 |
| Belgium [2]   | <i>Mytilus edulis</i>            | NA <sup>1</sup> | 0.28                                            | 0.28                                                            |
| Chile [3]     | <i>Zygochlamys patagonica</i>    | 10              | 0.32                                            | 0.32                                                            |
| China [4]     | <i>Mytilus galloprovincialis</i> | 50              | 5.68                                            | 2.56                                                            |
|               | <i>Mytilus galloprovincialis</i> | 15              | 2                                               |                                                                 |
|               | <i>Chlamys farreri</i>           | 50              | 5.43                                            |                                                                 |
| China [5]     | <i>Macraa veneriformis</i>       | 10              | 0.31                                            |                                                                 |
|               | <i>Ruditapes philippinarum</i>   | 10              | 0.74                                            |                                                                 |
|               | <i>Mytilus galloprovincialis</i> | 10              | 0.16                                            |                                                                 |
|               | <i>Mytilus galloprovincialis</i> | 10              | 0.42                                            |                                                                 |
| China [6]     | <i>Meretrix lusoria</i>          | 10              | 1.29                                            |                                                                 |
|               | <i>Meretrix lusoria</i>          | 10              | 2.23                                            |                                                                 |
|               | <i>Ruditapes philippinarum</i>   | 10              | 3.81                                            |                                                                 |
|               | <i>Ruditapes philippinarum</i>   | 10              | 2.22                                            |                                                                 |
|               | <i>Scapharca subcrenata</i>      | 10              | 4.39                                            |                                                                 |
|               | <i>Scapharca subcrenata</i>      | 10              | 4                                               |                                                                 |
|               | <i>Sinonovacula constricta</i>   | 10              | 2.83                                            |                                                                 |
|               | <i>Sinonovacula constricta</i>   | 10              | 1.83                                            |                                                                 |
|               | <i>Mytilus galloprovincialis</i> | 10              | 1.8                                             |                                                                 |
|               | <i>Perna viridis</i>             | 10              | 3.19                                            |                                                                 |

|           |                                  |    |       |
|-----------|----------------------------------|----|-------|
|           | <i>Crassostrea gigas</i>         | 10 | 1.99  |
|           | <i>Crassostrea gigas</i>         | 10 | 2.1   |
| China [7] | <i>Ruditapes philippinarum</i>   | 20 | 8.94  |
|           | <i>Mytilus galloprovincialis</i> | 20 | 2.32  |
|           | <i>Crassostrea gigas</i>         | 20 | 1.91  |
|           | <i>Chlamys farreri</i>           | 20 | 2.59  |
|           | <i>Ruditapes philippinarum</i>   | 20 | 12.3  |
|           | <i>Ruditapes philippinarum</i>   | 20 | 6.97  |
|           | <i>Ruditapes philippinarum</i>   | 20 | 10.85 |
|           | <i>Mytilus galloprovincialis</i> | 20 | 2.06  |
|           | <i>Mytilus galloprovincialis</i> | 10 | 2.56  |
|           | <i>Crassostrea gigas</i>         | 20 | 1.03  |
|           | <i>Crassostrea gigas</i>         | 20 | 0.93  |
|           | <i>Crassostrea gigas</i>         | 20 | 1.16  |
|           | <i>Chlamys farreri</i>           | 20 | 1.66  |
|           | <i>Chlamys farreri</i>           | 20 | 0.85  |
|           | <i>Chlamys farreri</i>           | 20 | 0.83  |
| China [8] | <i>Meretrix meretrix</i>         | 15 | 0.12  |
|           | <i>Meretrix meretrix</i>         | 15 | 0.31  |
|           | <i>Mytilus edulis</i>            | 15 | 0.11  |
|           | <i>Perna viridis</i>             | 15 | 0.28  |
| China [9] | <i>Cyclina sinensis</i>          | 30 | 3.98  |
|           | <i>Meretrix lusoria</i>          | 18 | 4.19  |
|           | <i>Ruditapes philippinarum</i>   | 24 | 2.52  |
|           | <i>Scapharca subcrenata</i>      | 6  | 10.45 |

|            |                                  |          |      |
|------------|----------------------------------|----------|------|
|            | <i>Sinonovacula constricta</i>   | 6        | 2.08 |
|            | <i>Tegillarca granosa</i>        | 18       | 4.13 |
|            | <i>Mytilus galloprovincialis</i> | 18       | 2.39 |
|            | <i>Alectryonella plicatula</i>   | 18       | 5.77 |
|            | <i>Patinopecten yessoensis</i>   | 6        | 2.34 |
| China [10] | <i>Mytilus edulis</i>            | 168      | 1.6  |
|            | <i>Mytilus edulis</i>            | 222      | 2.7  |
| China [11] | <i>Saccostrea cucullata</i>      | 330      | 4    |
| China [12] | <i>Mytilus edulis</i>            | 420      | 1.64 |
|            | <i>Mytilus edulis</i>            |          | 1.96 |
|            | <i>Mytilus edulis</i>            |          | 2.97 |
|            | <i>Mytilus edulis</i>            |          | 2.57 |
|            | <i>Mytilus edulis</i>            |          | 2.78 |
|            | <i>Mytilus edulis</i>            |          | 2.85 |
|            | <i>Mytilus edulis</i>            |          | 3.14 |
|            | <i>Mytilus edulis</i>            |          | 2.42 |
|            | <i>Mytilus edulis</i>            |          | 1.26 |
|            | <i>Mytilus edulis</i>            |          | 3.31 |
|            | <i>Mytilus edulis</i>            |          | 3.05 |
|            | <i>Mytilus edulis</i>            |          | 3.31 |
|            | <i>Mytilus edulis</i>            |          | 5.36 |
|            | <i>Mytilus edulis</i>            |          | 1.52 |
|            | <i>Perna viridis</i>             | 330      | 1.52 |
|            | <i>Perna viridis</i>             |          | 2.49 |
|            | <i>Perna viridis</i>             |          | 2.67 |
|            | <i>Perna viridis</i>             |          | 3.25 |
|            | <i>Perna viridis</i>             |          | 3.07 |
|            | <i>Perna viridis</i>             |          | 1.87 |
|            | <i>Perna viridis</i>             |          | 3.67 |
|            | <i>Perna viridis</i>             |          | 2.47 |
|            | <i>Perna viridis</i>             |          | 4.89 |
|            | <i>Perna viridis</i>             |          | 2.53 |
|            | <i>Perna viridis</i>             |          | 3.63 |
| China [13] | <i>Corbicula fluminea</i>        | 27 – 180 | 4.78 |
|            | <i>Corbicula fluminea</i>        | 65 – 650 | 2.18 |

|             |                                  |         |      |      |
|-------------|----------------------------------|---------|------|------|
| China [14]  | <i>Corbicula fluminea</i>        | 208     | 1.22 | 0.59 |
| China [15]  | <i>Crassostrea</i> sp.           | 306     | 0.62 |      |
| China [16]  | <i>Sinonovacula constricta</i>   | 10      | 0.27 |      |
|             | <i>Macra chinensis</i>           | 10      | 0.69 |      |
|             | <i>Scapharca subcrenata</i>      | 10      | 0.79 |      |
|             | <i>Mytilus galloprovincialis</i> | 10      | 1.17 |      |
|             | <i>Ruditapes philippinarum</i>   | 10      | 1.76 |      |
|             | <i>Chlamys farreri</i>           | 10      | 0.27 |      |
|             | <i>Saxidomus purpurata</i>       | 10      | 0.19 |      |
| China [17]  | <i>Meretrix meretrix</i>         | 126     | 0.47 |      |
|             | <i>Ruditapes philippinarum</i>   | 147     | 0.25 |      |
|             | <i>Sinonovacula constricta</i>   | 93      | 0.59 |      |
| China [18]  | <i>Saccostrea cucullata</i>      | 9       | 1.84 |      |
| China [19]  | <i>Sinonovacula constricta</i>   | 10 – 20 | 0.21 |      |
|             | <i>Ostrea denselamellosa</i>     | 10 – 20 | 0.31 |      |
| China [20]  | <i>Crassostrea gigas</i>         | 20      | 0.8  |      |
| China [21]  | <i>Crassostrea</i> sp.           | 110     | 2.44 |      |
|             | <i>Crassostrea</i> sp.           | 110     | 0.91 |      |
|             | <i>Crassostrea</i> sp.           | 110     | 0.91 |      |
|             | <i>Crassostrea</i> sp.           | 100     | 0.43 |      |
| China [22]  | <i>Acila mirabilis</i>           | 20      | 6.9  |      |
| France [23] | <i>Cerastoderma edule</i>        | 50      | 0.74 |      |
|             | <i>Cerastoderma edule</i>        | 50      | 0.19 |      |
|             | <i>Mytilus edulis</i>            | 50      | 0.15 |      |
|             | <i>Mytilus edulis</i>            | 50      | 0.25 |      |
| France [24] | <i>Mytilus edulis</i>            | 10      | 0.51 |      |
|             | <i>Mytilus edulis</i>            | 10      | 0.44 |      |

|                  |                                  |                 |       |       |
|------------------|----------------------------------|-----------------|-------|-------|
|                  | <i>Mytilus edulis</i>            | 10              | 0.84  |       |
|                  | <i>Mytilus edulis</i>            | 10              | 1.03  |       |
|                  | <i>Mytilus edulis</i>            | 10              | 2.76  |       |
| France [25]      | <i>Mytilus edulis</i>            | 120             | 0.23  |       |
|                  | <i>Crassostrea gigas</i>         | 60              | 0.18  |       |
| France [26]      | <i>Mytilus edulis</i>            | 15              | 0.23  |       |
| France [27]      | <i>Crassostrea gigas</i>         | 10              | 0.47  |       |
| France [2]       | <i>Mytilus edulis</i>            | NA <sup>1</sup> | 0.2   | 0.36  |
| Germany [27]     | <i>Mytilus edulis</i>            | 36              | 0.36  |       |
| Greece [28]      | <i>Mytilus galloprovincialis</i> | 40              | 2.5   | 3.9   |
|                  | <i>Mytilus galloprovincialis</i> | 40              | 5.3   |       |
| India [29]       | <i>Meretrix meretrix</i>         | 110             | 0.18  | 1.98  |
|                  | <i>Perna viridis</i>             | 90              | 1.8   |       |
| India [30]       | <i>Paphia malbarica</i>          | 15              | 0.7   |       |
|                  | <i>Perna viridis</i>             | 10              | 3.2   |       |
|                  | <i>Crassostrea</i> sp.           | 14              | 4     |       |
| Iran [31]        | <i>Amiantis purpuratus</i>       | 30              | 12.7  | 10.97 |
|                  | <i>Amiantis umbonella</i>        | 30              | 20    |       |
|                  | <i>Pinctada radiata</i>          | 33              | 0.2   |       |
| Italy [32]       | <i>Mytilus edulis</i>            | 380             | 0.15  | 0.27  |
|                  | <i>Mytilus galloprovincialis</i> | 370             | 0.39  |       |
| Mexico [33]      | <i>Magallana gigas</i>           | 360             | 0.06  | 0.06  |
| Netherlands [2]  | <i>Mytilus edulis</i>            | NA              | 0.13  | 0.13  |
| New Zealand [34] | <i>Perna canaliculus</i>         | 96              | 0.041 | 0.041 |
| Norway [35]      | <i>Mytilus</i> sp.               | 332             | 0.97  | 0.97  |
| Portugal [36]    | <i>Mytilus</i> sp.               | NA              | 1.175 | 0.56  |
| Portugal [37]    | <i>Scrobicularia plana</i>       | 140             | 0.07  |       |
|                  | <i>Mytilus galloprovincialis</i> | 140             | 0.18  |       |
| Portugal [38]    | <i>Mytilus galloprovincialis</i> | 30              | 0.83  |       |

|                      |                                                     |     |       |      |
|----------------------|-----------------------------------------------------|-----|-------|------|
| South Africa<br>[39] | <i>Mytilus</i> sp.                                  | 30  | 0.04  | 0.04 |
| South Korea<br>[40]  | <i>Tapes philippinarum</i>                          | 25  | 0.34  | 0.49 |
|                      | <i>Mytilus edulis</i>                               | 25  | 0.12  |      |
|                      | <i>Crassostrea gigas</i>                            | 25  | 0.07  |      |
|                      | <i>Patinopecten yessoensis</i>                      | 25  | 0.08  |      |
| South Korea<br>[41]  | <i>Mytilus edulis</i>                               | 42  | 1.43  |      |
|                      | <i>Crassostrea gigas</i>                            | 30  | 1.13  |      |
| South Korea<br>[42]  | <i>Mytilus edulis</i> /<br><i>Crassostrea gigas</i> | 300 | 0.33  | 0.41 |
|                      | <i>Ruditapes philippinarum</i>                      | 150 | 0.43  |      |
| Thailand<br>[43]     | <i>Meretrix lyrata</i>                              | 60  | 0.155 |      |
|                      | <i>Perna viridis</i>                                | 60  | 0.5   |      |
| Thailand<br>[44]     | <i>Saccostrea forskalii</i>                         | 15  | 0.43  |      |
|                      | <i>Saccostrea forskalii</i>                         | 15  | 0.57  |      |
|                      | <i>Saccostrea forskalii</i>                         | 15  | 0.37  |      |
| Tunisia<br>[45]      | <i>Ruditapes decussatus</i>                         | 24  | 1.44  | 1.24 |
|                      | <i>Mytilus galloprovincialis</i>                    | 15  | 0.79  |      |
|                      | <i>Crassostrea gigas</i>                            | 3   | 1.48  |      |
| UK [3]               | <i>Pecten maximus</i>                               | 10  | 0.17  | 1.94 |
| UK [46]              | <i>Mytilus edulis</i>                               | NA  | 2.5   |      |
| UK<br>[47]           | <i>Modiolus modiolus</i>                            | 6   | 0.086 |      |
|                      | <i>Mytilus</i> spp.                                 | 36  | 3     |      |
| UK<br>[48]           | <i>Mytilus edulis</i>                               | NA  | 1.3   |      |
|                      | <i>Mytilus edulis</i>                               | NA  | 3.52  |      |
|                      | <i>Mytilus edulis</i>                               | NA  | 4.44  |      |
|                      | <i>Mytilus edulis</i>                               | NA  | 3.05  |      |
| UK [49]              | <i>Mytilus edulis</i>                               | 36  | 0.9   |      |

|              |                          |     |       |      |
|--------------|--------------------------|-----|-------|------|
|              | <i>Mytilus edulis</i>    | 12  | 1.23  |      |
|              | <i>Mytilus edulis</i>    | 18  | 2.55  |      |
|              | <i>Mytilus edulis</i>    | 30  | 1.59  |      |
|              | <i>Mytilus edulis</i>    | 18  | 2.37  |      |
|              | <i>Mytilus edulis</i>    | 18  | 0.95  |      |
|              | <i>Mytilus edulis</i>    | 24  | 0.72  |      |
|              | <i>Mytilus edulis</i>    | 30  | 2.89  |      |
|              | <i>Mytilus edulis</i>    | 12  | 1.65  |      |
| USA [50]     | <i>Siliqua patula</i>    | 142 | 0.16  | 0.20 |
|              | <i>Crassostrea gigas</i> | 141 | 0.35  |      |
| USA [51]     | <i>Crassostrea gigas</i> | 30  | 0.097 |      |
| Vietnam [52] | <i>Perna viridis</i>     | 5   | 0.29  | 0.29 |

<sup>1</sup> NA means the information is not available in the study.



**Table S2.** Risk level criteria for microplastic pollution load index.

| Value of the pollution load index <sup>1</sup> | < 10 | 10–20 | 20–30 | > 30 |
|------------------------------------------------|------|-------|-------|------|
| Risk category                                  | I    | II    | III   | IV   |

<sup>1</sup> The rank partition of risk was referenced from Xu et al. (2018).

**Table S3.** The hazard score for the dominant microplastic polymers in bivalves globally.

| Polymer                           | Abbreviation | Monomer             | Score <sup>1</sup> |
|-----------------------------------|--------------|---------------------|--------------------|
| Polyvinyl chloride                | PVC          | Vinyl chloride      | 10551              |
| Polyethylene terephthalate        | PET          | Ethanediol          | 4                  |
| Polyethylene                      | PE           | Ethylene            | 11                 |
| Polystyrene                       | PS           | Styrene             | 30                 |
| Polymethyl methacrylate (Acrylic) | PMMA         | Methyl methacrylate | 1021               |
| Polyamide (Nylon)                 | PA           | Adipic acid         | 47                 |
| Polypropylene                     | PP           | Propylene           | 1                  |
| Polyester                         | –            | –                   | –                  |
| Cellophane                        | –            | –                   | –                  |
| Rayon                             | –            | –                   | –                  |

<sup>1</sup> The value for the score of each polymer is taken from Lithner et al. (2011).

– represents that its hazard score cannot be determined.

**Table S4.** Risk level criteria for microplastic polymer risk index.

| Value of polymer risk index <sup>1</sup> | <10 | 10–100 | 100–1000 | 1000–10000 | >10000 |
|------------------------------------------|-----|--------|----------|------------|--------|
| Risk category                            | I   | II     | III      | IV         | V      |

<sup>1</sup> The rank partition of risk was referenced from Lithner et al. (2011).

## References

- Truchet, D.M.; López, A.D.F.; Arduoso, M.G.; Rimondino, G.N.; Buzzi, N.S.; Malanca, F.E.; Spetter, C.V.; Severini, M.D.F. Microplastics in bivalves, water and sediments from a touristic sandy beach of Argentina. *Mar. Pollut. Bull.* **2021**, *173*, 113023.
- Van Cauwenberghe, L.; Claessens, M.; Vandegehuchte, M.B.; Janssen, C.R. Microplastics are taken up by mussels (*Mytilus edulis*) and lugworms (*Arenicola marina*) living in natural habitats. *Environ. Pollut.* **2015**, *199*, 10–17.
- Akoueson, F.; Sheldon, L.M.; Danopoulos, E.; Morris, S.; Hotten, J.; Chapman, E.; Li, J.; Rotchell, J.M. A preliminary analysis of microplastics in edible versus non-edible tissues from seafood samples. *Environ. Pollut.* **2020**, *263*, 114452.
- Ding, J.; Li, J.; Sun, C.; He, C.; Jiang, F.; Gao, F.; Zheng, L. Separation and identification of microplastics in digestive system of bivalves. *Chinese. J. Anal. Chem.* **2018**, *46*, 690–697.
- Ding, J.; Li, J.; Sun, C.; Jiang, F.; Ju, P.; Qu, L.; Zheng, Y.; He, C. Detection of microplastics in local marine organisms using a multi-technology system. *Anal. Methods-U.K.* **2018**, *11*, 78–87.

6. Ding, J.; Li, J.; Sun, C.; Jiang, F.; He, C.; Zhang, M.; Ju, P.; Ding, N.X. An examination of the occurrence and potential risks of microplastics across various shellfish. *Sci. Total Environ.* **2020**, *739*, 139887.
7. Ding, J.; Sun, C.; He, C.; Li, J.; Ju, P.; Li, F. Microplastics in four bivalve species and basis for using bivalves as bioindicators of microplastic pollution. *Sci. Total Environ.* **2021**, *782*, 146830.
8. Fang, C.; Zheng, R.; Chen, H.; Hong, F.; Lin, L.; Lin, H.; Guo, H.; Bailey, C.; Segner, H.; Mu, J.; Bo, J. Comparison of microplastic contamination in fish and bivalves from two major cities in Fujian province, China and the implications for human health. *Aquaculture* **2019**, *512*, 734322.
9. Li, J.; Yang, D.; Li, L.; Jabeen, K.; Shi, H. Microplastics in commercial bivalves from China. *Environ. Pollut.* **2015**, *207*, 190-195.
10. Li, J.; Qu, X.; Lei, S.; Zhang, W.; Shi, H. Microplastics in mussels along the coastal waters of China. *Environ. Pollut.* **2016**, *214*, 177-184.
11. Li, H.; Ma, L.; Lin, L.; Ni, Z.; Xu, X.; Shi, H.; Yan, Y.; Zheng, G.; Rittschof, D. Microplastics in oysters *Saccostrea cucullata* along the Pearl River Estuary, China. *Environ. Pollut.* **2018**, *236*, 619-625.
12. Qu, X.; Su, L.; Li, H.; Liang, M.; Shi, H. Assessing the relationship between the abundance and properties of microplastics in water and in mussels. *Sci. Total Environ.* **2018**, *621*, 679-686.
13. Su, L.; Xue, Y.; Li, L.; Yang, D.; Kolandhasamy, P.; Li, D.; Shi, H. Microplastics in Taihu Lake, China. *Environ. Pollut.* **2016**, *216*, 711-719.
14. Su, L.; Cai, H.; Kolandhasamy, P.; Wu, C.; Rochman, C.M.; Shi, H. Using the Asian clam as an indicator of microplastic pollution in freshwater ecosystems. *Environ. Pollut.* **2018**, *234*, 347-355.
15. Teng, J.; Wang, Q.; Ran, W.; Wu, D.; Liu, Y.; Sun, S.; Liu, H.; Cao, R.; Zhao, J. Microplastic in cultured oysters from different coastal areas of China. *Sci. Total Environ.* **2019**, *653*, 1282-1292.
16. Liu, J.; Zhu, X.; Teng, J.; Zhao, J.; Li, C.; Shan, E.; Zhang, C.; Wang, Q. Pollution characteristics of microplastics in mollusks from the coastal area of Yantai, China. *B. Environ. Contem. Tox.* **2021**, *107*, 693-699.
17. Wang, T.; Li, B.; Wang, D. The abundance and characteristics of microplastics in commonly consumed shellfish in the Jiangsu coastal region of China. *Environ. Sci. Pollut. R.* **2021**, *28*, 60753-60764.
18. Wang, D.; Su, L.; Ruan, H.D.; Chen, J.; Lu, J.; Lee, C.; Jiang, S.Y. Quantitative and qualitative determination of microplastics in oyster, seawater and sediment from the coastal areas in Zhuhai, China. *Mar. Pollut. Bull.* **2021**, *164*, 112000.
19. Wu, F.; Wang, Y.; Leung, J.Y.S.; Huang, W.; Zeng, J.; Tang, Y.; Chen, J.; Shi, A.; Yu, X.; Xu, X.; Zhang, H.; Cao, L. Accumulation of microplastics in typical commercial aquatic species: A case study at a productive aquaculture site in China. *Sci. Total Environ.* **2020**, *708*, 135432.
20. Zhu, J.; Zhang, Q.; Li, Y.; Tan, S.; Kang, Z.; Yu, X.; Lan, W.; Cai, L.; Wang, J.; Shi, H. Microplastic pollution in the Maowei Sea, a typical mariculture bay of China. *Sci. Total Environ.* **2019**, *658*, 62-68.
21. Zhu, J.; Zhang, Q.; Huang, Y.; Jiang, Y.; Li, J.; Michal, J.J.; Jiang, Z.; Xu, Y.; Lan, W. Long-term trends of microplastics in seawater and farmed oysters in the Maowei Sea, China. *Environ. Pollut.* **2021**, *273*, 116450.
22. Wang, J.; Wang, M.; Ru, S.; Liu, X. High levels of microplastic pollution in the sediments and benthic organisms of the South Yellow Sea, China. *Sci. Total Environ.* **2019**, *651*, 1661-1669.
23. Hermabessiere, L.; Paul-Pont, I.; Cassone, A.; Himber, C.; Receveur, J.; Jezequel, R.; El Rakwe, M.; Rinnert, E.; Rivière, G.; Lambert, C.; Huvet, A.; Dehaut, A.; Duflos, G.; Soudant, P. Microplastic contamination and pollutant levels in mussels and cockles collected along the channel coasts. *Environ. Pollut.* **2019**, *250*, 807-819.
24. Kazour, M.; Amara, R. Is blue mussel caging an efficient method for monitoring environmental microplastics pollution? *Sci. Total Environ.* **2020**, *710*, 135649.
25. Phuong, N.N.; Poirier, L.; Pham, Q.T.; Lagarde, F.; Zalouk-Vergnoux, A. Factors influencing the microplastic contamination of bivalves from the French Atlantic coast: Location, season and/or mode of life? *Mar. Pollut. Bull.* **2017**, *129*, 1-15.
26. Phuong, N.N.; Zalouk-Vergnoux, A.; Kamari, A.; Mouneyrac, C.; Amiard, F.; Poirier, L.; Lagarde, F. Quantification and characterization of microplastics in blue mussels (*Mytilus edulis*): Protocol setup and preliminary data on the contamination of the French Atlantic coast. *Environ. Sci. Pollut. R.* **2018**, *25*, 6135-6144.
27. Van Cauwenberghe, L.; Janssen, C.R. Microplastics in bivalves cultured for human consumption. *Environ. Pollut.* **2014**, *193*, 65-70.
28. Digka, N.; Tsangaris, C.; Torre, M.; Anastasopoulou, A.; Zeri, C. Microplastics in mussels and fish from the Northern Ionian Sea. *Mar. Pollut. Bull.* **2018**, *135*, 30-40.
29. Dowarah, K.; Patchaiyappan, A.; Thirunavukkarasu, C.; Jayakumar, S.; Devipriya, S.P. Quantification of microplastics using Nile Red in two bivalve species *Perna viridis* and *Meretrix*

- meretrix* from three estuaries in Pondicherry, India and microplastic uptake by local communities through bivalve diet. *Mar. Pollut. Bull.* **2020**, *153*, 110982.
30. Saha, M.; Naik, A.; Desai, A.; Nanajkar, M.; Rathore, C.; Kumar, M.; Gupta, P. Microplastics in seafood as an emerging threat to marine environment: A case study in Goa, west coast of India. *Chemosphere* **2021**, *270*, 129359.
  31. Naji, A.; Nuri, M.; Vethaak, A.D. Microplastics contamination in molluscs from the northern part of the Persian Gulf. *Environ. Pollut.* **2018**, *235*, 113-120.
  32. Nalbone, L.; Cincotta, F.; Giarratana, F.; Ziino, G.; Panebianco, A. Microplastics in fresh and processed mussels sampled from fish shops and large retail chains in Italy. *Food Control* **2021**, *125*, 108003.
  33. Lozano-Hernández, E.A.; Ramírez-álvarez, N.; Rios Mendoza, L.M.; Macías-Zamora, J.V.; Sánchez-Osorio, J.L.; Hernández-Guzmán, F.A. Microplastic concentrations in cultured oysters in two seasons from two bays of Baja California, Mexico. *Environ. Pollut.* **2021**, *290*, 118031.
  34. Webb, S.; Ruffell, H.; Marsden, I.; Pantos, O.; Gaw, S. Microplastics in the New Zealand green lipped mussel *Perna canaliculus*. *Mar. Pollut. Bull.* **2019**, *149*, 110641.
  35. Brate, I.L.N.; Hurley, R.; Iversen, K.; Beyer, J.; Thomas, K.V.; Steindal, C.C.; Green, N.W.; Olsen, M.; Lusher, A. *Mytilus* spp. as sentinels for monitoring microplastic pollution in Norwegian coastal waters: A qualitative and quantitative study. *Environ. Pollut.* **2018**, *243*, 383-393.
  36. Marques, F.; Vale, C.; Rudnitskaya, A.; Moreirinha, C.; Costa, S.T.; Botelho, M.J. Major characteristics of microplastics in mussels from the Portuguese coast. *Environ. Res.* **2021**, *197*, 110993.
  37. Pequeno, J.; Antunes, J.; Dhimmer, V.; Bessa, F.; Sobral, P. Microplastics in marine and estuarine species from the coast of Portugal. *Front. Environ. Sci. Eng.* **2021**, *9*, 579127.
  38. Vital, S.A.; Cardoso, C.; Avio, C.; Pittura, L.; Regoli, F.; Bebianno, M.J. Do microplastic contaminated seafood consumption pose a potential risk to human health? *Mar. Pollut. Bull.* **2021**, *171*, 112769.
  39. Sparks, C.; Awe, A.; Maneveld, J. Abundance and characteristics of microplastics in retail mussels from Cape Town, South Africa. *Mar. Pollut. Bull.* **2021**, *166*, 112186.
  40. Cho, Y.; Shim, W.J.; Jang, M.; Han, G.M.; Hong, S.H. Abundance and characteristics of microplastics in market bivalves from South Korea. *Environ. Pollut.* **2019**, *245*, 1107-1116.
  41. Jang, M.; Shim, W.J.; Cho, Y.; Han, G.M.; Song, Y.K.; Hong, S.H. A close relationship between microplastic contamination and coastal area use pattern. *Water Res.* **2020**, *171*, 115400.
  42. Cho, Y.; Shim, W.J.; Jang, M.; Han, G.M.; Hong, S.H. Nationwide monitoring of microplastics in bivalves from the coastal environment of Korea. *Environ. Pollut.* **2021**, *270*, 116175.
  43. Chinfak, N.; Sompongchaiyakul, P.; Charoenpong, C.; Shi, H.; Yeemin, T.; Zhang, J. Abundance, composition, and fate of microplastics in water, sediment, and shellfish in the Tapi-Phumduang River system and Bandon Bay, Thailand. *Sci. Total Environ.* **2021**, *781*, 146700.
  44. Thushari, G.G.N.; Senevirathna, J.D.M.; Yakupitiyage, A.; Chavanich, S. Effects of microplastics on sessile invertebrates in the eastern coast of Thailand: An approach to coastal zone conservation. *Mar. Pollut. Bull.* **2017**, *124*, 349-355.
  45. Abidli, S.; Lahbib, Y.; Trigui El Menif, N. Microplastics in commercial molluscs from the lagoon of Bizerte (Northern Tunisia). *Mar. Pollut. Bull.* **2019**, *142*, 243-252.
  46. Catarino, A.I.; Thompson, R.; Sanderson, W.; Henry, T.B. Development and optimization of a standard method for extraction of microplastics in mussels by enzyme digestion of soft tissues. *Environ. Toxicol. Chem.* **2017**, *36*, 947-951.
  47. Catarino, A.I.; Macchia, V.; Sanderson, W.G.; Thompson, R.C.; Henry, T.B. Low levels of microplastics (MP) in wild mussels indicate that MP ingestion by humans is minimal compared to exposure via household fibres fallout during a meal. *Environ. Pollut.* **2018**, *237*, 675-684.
  48. Courteney-Jones, W.; Quinn, B.; Murphy, F.; Gary, S.; Narayanaswamy, B.E. Optimisation of enzymatic digestion and validation of specimen preservation methods for the analysis of ingested microplastics. *Anal. Methods-U.K.* **2017**, *10*, 1039.
  49. Li, J.; Green, C.; Reynolds, A.; Shi, H.; Rotchell, J.M. Microplastics in mussels sampled from coastal waters and supermarkets in the United Kingdom. *Environ. Pollut.* **2018**, *241*, 35-44.
  50. Baechler, B.R.; Granek, E.F.; Hunter, M.V.; Conn, K.E. Microplastic concentrations in two Oregon bivalve species: Spatial, temporal, and species variability. *Limnol. Oceanogr.: Lett.* **2019**, *5*, 54-65.
  51. Martinelli, J.C.; Phan, S.; Luscombe, C.K.; Padilla-Gamiño, J.L. Low incidence of microplastic contaminants in Pacific oysters (*Crassostrea gigas* Thunberg) from the Salish Sea, USA. *Sci. Total Environ.* **2020**, *715*, 136826.
  52. Nam, P.N.; Tuan, P.Q.; Thuy, D.T.; Amiard, F. Contamination of microplastic in bivalve: First evaluation in Vietnam. *Vie. J. Earth Sci.* **2019**, *41*, 252-258.
